# Supplementary material for: La clausula rebus sic stantibus s'applique-t-elle aussi au droit international coutumier?
Source: MDPI journal article supplement (doi:10.3390/biology12050652), 2011-01-01
Supplement: s1 [file s1]

## Supporting Materials

**Table S1.** Description of the CMCC-BioClimInd dataset according to the ODMAP protocol.

| Section  | Subsection        | Element              | Value                                                                                                                                                                                                                                                                                                                                                               |
|----------|-------------------|----------------------|---------------------------------------------------------------------------------------------------------------------------------------------------------------------------------------------------------------------------------------------------------------------------------------------------------------------------------------------------------------------|
| Overview | Authorship        | Study title          | CMCC-BioClimInd                                                                                                                                                                                                                                                                                                                                                     |
| Overview | Authorship        | Author names         | Feixue Zhang, Chun-Jing Wang, Chun-Hui Zhang <sup>1</sup> , Ji-Zhong Wan                                                                                                                                                                                                                                                                                            |
| Overview | Authorship        | Contact              | Zfx660109@163.com                                                                                                                                                                                                                                                                                                                                                   |
| Overview | Authorship        | Study link           | <a href="https://www.nature.com/articles/s41597-020-00726-5">https://www.nature.com/articles/s41597-020-00726-5</a> (accessed on 2 April 2023)                                                                                                                                                                                                                      |
| Overview | Model objective   | Model objective      | Forecast and transfer                                                                                                                                                                                                                                                                                                                                               |
| Overview | Model objective   | Target output        | The probability of distribution of invasive alien plants                                                                                                                                                                                                                                                                                                            |
| Overview | Focal Taxon       | Focal Taxon          | species                                                                                                                                                                                                                                                                                                                                                             |
| Overview | Location          | Location             | the whole world                                                                                                                                                                                                                                                                                                                                                     |
| Overview | Scale of Analysis | Spatial extent       | -180, 180, -90, 90 (xmin, xmax, ymin, ymax)                                                                                                                                                                                                                                                                                                                         |
| Overview | Scale of Analysis | Spatial resolution   | 0.5°                                                                                                                                                                                                                                                                                                                                                                |
| Overview | Scale of Analysis | Temporal extent      | 1970–1999                                                                                                                                                                                                                                                                                                                                                           |
| Overview | Scale of Analysis | Temporal resolution  | We obtained a set of 35 bioclimatic variables with a spatial resolution of 0.5 ° × 0.5 ° (1960 – 1999), covering the entire world (excluding Antarctica) [46]. WorldClim downloaded from ( <a href="https://www.worldclim.org">https://www.worldclim.org</a> ). A set of 5 arc minutes (10 × 10 km ?) spatial resolution for 19 bioclimatic variables (1970 – 2000) |
| Overview | Scale of Analysis | Boundary             | natural                                                                                                                                                                                                                                                                                                                                                             |
| Overview | Biodiversity data | Observation type     | standardized momitoring                                                                                                                                                                                                                                                                                                                                             |
| Overview | Biodiversity data | Response data type   | presence/absence                                                                                                                                                                                                                                                                                                                                                    |
| Overview | Predictors        | Predictor types      | climatic                                                                                                                                                                                                                                                                                                                                                            |
| Overview | Hypotheses        | Hypotheses           | Climate variables affect the distribution of species                                                                                                                                                                                                                                                                                                                |
| Overview | Assumptions       | Model assumptions    | The CMCC BioClimInd dataset has good performance                                                                                                                                                                                                                                                                                                                    |
| Overview | Algorithms        | Modelling techniques | maxent                                                                                                                                                                                                                                                                                                                                                              |
| Overview | Algorithms        | Model complexity     | The invasive plant species distributional data were divided into a random training test set (auctest, 75%) and a test model set (aucrain, 25%). The regularisation multiplier was set to two and the number of replicates to four.                                                                                                                                  |
| Overview | Algorithms        | Model averaging      | we employed two threshold-dependent measures: omission rates based on two threshold rules (10% calibration omission rate and lowest presence threshold, LPT = 0% calibration omission rate =minimum                                                                                                                                                                 |

training presence threshold of Maxent software). Omission rates are the proportion of evaluation localities that fall outside of the model once converted to a binary prediction. Omission rates provide information regarding both discriminatory ability and overfitting, evaluated at particular thresholds. In general, lower omission indicates higher performance (better discrimination between suitable versus unsuitable areas). In addition, overfit models have omission rates higher than theoretical expectations. The lowest presence threshold sets the threshold at the lowest value of the prediction for any pixel that contains a calibration locality and has an expected omission rate of zero for evaluation localities. Similarly, the 10% calibration omission rate rule sets the threshold at a value that excludes the 10% of calibration localities with lowest prediction and has an expected omission rate of 0.10. We obtained the two threshold-dependent measures and averaged their values as for AUC.

Based on species occurrence data and relevant environmental variables, Maxent model is used to model species distribution under climate change [56,57]. Here, we established a logistic regression model with data from the 11 invasive plant species distributions as response variables, and by running the Maxent model four times using the climate variables in the four climate data sets, namely, WorldClim and CMCC-BioClimInd (bio1-bio35), CMCC-BioClimInd (bio1-bio19), and CMCC-BioClimInd (bio20-bio35). The IPS distributional data were divided into a random training test set (auc<sub>test</sub>, 75%) and a test model set (auc<sub>train</sub>, 25%). The regularisation multiplier was set to two and the number of replicates to four. We use the area under the curve (AUC) of the receiver's operating characteristics to evaluate the

prediction accuracy of the species distribution model. AUC takes each value of the prediction result as a possible threshold, and then obtains the corresponding sensitivity and specificity values to calculate the curve [60]. The greater the AUC value, the greater the deviation between species distribution and random distribution (i.e.,  $AUC = 0.5$ ). The greater the correlation between variables and models, the higher the accuracy of models.  $AUC > 0.7$  indicates that the model is effective. we employed two threshold-dependent measures: omission rates based on two threshold rules (10% calibration omission rate and lowest presence threshold,  $LPT = 0\%$  calibration omission rate = minimum training presence threshold of Maxent software). Omission rates are the proportion of evaluation localities that fall outside of the model once converted to a binary prediction. Omission rates provide information regarding both discriminatory ability and overfitting, evaluated at particular thresholds. In general, lower omission indicates higher performance (better discrimination between suitable versus unsuitable areas). In addition, overfit models have omission rates higher than theoretical expectations. The lowest presence threshold sets the threshold at the lowest value of the prediction for any pixel that contains a calibration locality and has an expected omission rate of zero for evaluation localities. Similarly, the 10% calibration omission rate rule sets the threshold at a value that excludes the 10% of calibration localities with lowest prediction and has an expected omission rate of 0.10. We obtained the two threshold-dependent measures and averaged their values as for AUC.

|          |          |                   |                                                                                                                     |
|----------|----------|-------------------|---------------------------------------------------------------------------------------------------------------------|
| Overview | Software | Software          | Maxent version 3.3.3                                                                                                |
| Overview | Software | Code availability | <a href="https://github.com/Maxnet-reinforcement-learning-kr/lets-do-irl">reinforcement-learning-kr/lets-do-irl</a> |
| Overview | Software | Data availability | <a href="https://www.gbif.org/">https://www.gbif.org/</a>                                                           |

|      |                     |                             |                                                                                                                                                                                                                                 |
|------|---------------------|-----------------------------|---------------------------------------------------------------------------------------------------------------------------------------------------------------------------------------------------------------------------------|
| Data | Biodiversity data   | Taxon names                 | Ligustrum robustum, Cinchona pubescens, Morella faya, Miconia calvescens, Cecropia peltate, Spathodea campanulata, Melaleuca quinquenervia, Schinus terebinthifolia, Acacia mearnsii, Leucaena leucocephala, and Pinus pinaster |
| Data | Biodiversity data   | Taxonomic reference system  | no have                                                                                                                                                                                                                         |
| Data | Biodiversity data   | Ecological level            | Species-level                                                                                                                                                                                                                   |
| Data | Biodiversity data   | Data sources                | GBIF; <a href="https://www.gbif.org/">https://www.gbif.org/</a>                                                                                                                                                                 |
| Data | Biodiversity data   | Sampling design             | temporal design                                                                                                                                                                                                                 |
| Data | Biodiversity data   | Sample size                 | prevalence                                                                                                                                                                                                                      |
| Data | Biodiversity data   | Clipping                    | no have                                                                                                                                                                                                                         |
| Data | Biodiversity data   | Scaling                     | spatial and temporal thinning                                                                                                                                                                                                   |
| Data | Biodiversity data   | Cleaning                    | outlier presence/treatment                                                                                                                                                                                                      |
| Data | Biodiversity data   | Absence data                | no have                                                                                                                                                                                                                         |
| Data | Biodiversity data   | Background data             | spatial and temporal buffer, bias correction                                                                                                                                                                                    |
| Data | Biodiversity data   | Errors and biases           | geo-referencing errors, sampling bias                                                                                                                                                                                           |
| Data | Data partitioning   | Training data               | training test set (auctest, 75%)                                                                                                                                                                                                |
| Data | Data partitioning   | Validation data             | cross-validation method                                                                                                                                                                                                         |
| Data | Data partitioning   | Test data                   | test model set (auctrain, 25%)                                                                                                                                                                                                  |
| Data | Predictor variables | Predictor variables         | Worldclim(bio1-bio19);CMCC-BioClimInd                                                                                                                                                                                           |
| Data | Predictor variables | Data sources                | CMCC-BioClimInd 1.0 and WorldClim 2.0 datasets for the historical period                                                                                                                                                        |
| Data | Predictor variables | Spatial extent              | -180, 180, -90, 90 (xmin, xmax, ymin, ymax)                                                                                                                                                                                     |
| Data | Predictor variables | Spatial resolution          | 0.5°                                                                                                                                                                                                                            |
| Data | Predictor variables | Coordinate reference system | ESRI PE string                                                                                                                                                                                                                  |
| Data | Predictor variables | Temporal extent             | no have                                                                                                                                                                                                                         |
| Data | Predictor variables | Temporal resolution         | no have                                                                                                                                                                                                                         |
| Data | Predictor variables | Data processing             | pscaling/downscaling                                                                                                                                                                                                            |
| Data | Predictor variables | Errors and biases           | no have                                                                                                                                                                                                                         |
| Data | Predictor variables | Dimension reduction         | no have                                                                                                                                                                                                                         |
| Data | Transfer data       | Data sources                | no have                                                                                                                                                                                                                         |
| Data | Transfer data       | Spatial extent              | -180, 180, -90, 90 (xmin, xmax, ymin, ymax)                                                                                                                                                                                     |
| Data | Transfer data       | Spatial resolution          | no have                                                                                                                                                                                                                         |
| Data | Transfer data       | Temporal extent             | no have                                                                                                                                                                                                                         |
| Data | Transfer data       | Temporal resolution         | no have                                                                                                                                                                                                                         |

|            |                                               |                                |                                                                                     |
|------------|-----------------------------------------------|--------------------------------|-------------------------------------------------------------------------------------|
| Data       | Transfer data                                 | Models and scenarios           | Maxent                                                                              |
| Data       | Transfer data                                 | Data processing                | no have                                                                             |
| Data       | Transfer data                                 | Quantification of Novelty      | distance to training data                                                           |
| Model      | Variable pre-selection                        | Variable pre-selection         | Climate variables                                                                   |
| Model      | Multicollinearity                             | Multicollinearity              | Not used                                                                            |
| Model      | Model settings                                | Model settings (fitting)       | maxent: no settings provided                                                        |
| Model      | Model settings                                | Model settings (extrapolation) | clamping                                                                            |
| Model      | Model estimates                               | Coefficients                   | median or mean posterior                                                            |
| Model      | Model estimates                               | Parameter uncertainty          | resampling                                                                          |
| Model      | Model estimates                               | Variable importance            | contribution;jackknife                                                              |
| Model      | Model selection - model averaging - ensembles | Model selection                | information-theoretic approach for variable selection, shrinkage and regularization |
| Model      | Model selection - model averaging - ensembles | Model averaging                | derivation of weights                                                               |
| Model      | Model selection - model averaging - ensembles | Model ensembles                | model classes, model parameters, boundary conditions                                |
| Model      | Analysis and Correction of non-independence   | Spatial autocorrelation        | Not used                                                                            |
| Model      | Analysis and Correction of non-independence   | Temporal autocorrelation       | Not used                                                                            |
| Model      | Analysis and Correction of non-independence   | Nested data                    | fixed and random effects                                                            |
| Model      | Threshold selection                           | Threshold selection            | transforming continuous predictions into binary predictions                         |
| Assessment | Performance statistics                        | Performance on training data   | AUC; False negative rate; False positive rate                                       |
| Assessment | Performance statistics                        | Performance on validation data | AUC; False negative rate; False positive rate                                       |
| Assessment | Performance statistics                        | Performance on test data       | AUC; False negative rate; False positive rate                                       |
| Assessment | Plausibility check                            | Response shapes                | partial response plots                                                              |
| Assessment | Plausibility check                            | Expert judgement               | map display                                                                         |
| Prediction | Prediction output                             | Prediction unit                | Species distribution probability                                                    |
| Prediction | Prediction output                             | Post-processing                | clipping                                                                            |
| Prediction | Uncertainty quantification                    | Algorithmic uncertainty        | Setting parameters for the Maxent model                                             |
| Prediction | Uncertainty quantification                    | Input data uncertainty         | No have                                                                             |
| Prediction | Uncertainty quantification                    | Parameter uncertainty          | No have                                                                             |

|            |                            |                      |                |
|------------|----------------------------|----------------------|----------------|
| Prediction | Uncertainty quantification | Scenario uncertainty | climate models |
| Prediction | Uncertainty quantification | Novel environments   | masking        |

**Table S2.** Climate variables in CMCC-BioclimInd dataset including codes, full names and units for IPS. bio1~bio19 were the same as WorldClim dataset [46].

| Code  | Name                                                | Unit  |
|-------|-----------------------------------------------------|-------|
| bio1  | Annual mean temperature                             | °C    |
| bio2  | Mean diurnal range                                  | °C    |
| bio3  | Isothermality                                       | %     |
| bio4  | Temperature seasonality                             | °C    |
| bio5  | Max temperature of warmest month                    | °C    |
| bio6  | Min temperature of coldest month                    | °C    |
| bio7  | Temperature annual range                            | °C    |
| bio8  | Mean temperature of wettest quarter                 | °C    |
| bio9  | Mean temperature of driest quarter                  | °C    |
| bio10 | Mean temperature of warmest quarter                 | °C    |
| bio11 | Mean temperature of coldest quarter                 | °C    |
| bio12 | Annual precipitation                                | mm    |
| bio13 | Precipitation of wettest month                      | mm    |
| bio14 | Precipitation of driest month                       | mm    |
| bio15 | Precipitation seasonality                           | %     |
| bio16 | Precipitation of wettest quarter                    | mm    |
| bio17 | Precipitation of driest quarter                     | mm    |
| bio18 | Precipitation of warmest quarter                    | mm    |
| bio19 | Precipitation of coldest quarter                    | mm    |
| bio20 | Ellenberg quotient                                  | °C/mm |
| bio21 | Yearly positive temperature                         | °C    |
| bio22 | Sum of annual temperature                           | °C    |
| bio23 | Ombrotermic index                                   | mm/°C |
| bio24 | Yearly positive precipitation                       | mm    |
| bio25 | Modified Kira coldness index                        | °C    |
| bio26 | Modified Kira warmth index                          | °C    |
| bio27 | Simplified continentality index                     | °C    |
| bio28 | Mean temperature of warmest month                   | °C    |
| bio29 | Mean temperature of coldest month                   | °C    |
| bio30 | Mean temperature of driest month                    | °C    |
| bio31 | Mean temperature of wettest month                   | °C    |
| bio32 | Modified Thermicity index                           | °C    |
| bio33 | Ombrothermic index of summer and the previous month | mm/°C |
| bio34 | Potential Evapotranspiration Hargreaves             | mm    |
| bio35 | Potential Evapotranspiration Thornthwaite           | mm    |

**Table S3.** The significance of differences in the average contribution rate (%) of bioclimatic variables to species distribution probability between WorldClim and CMCC-BioclimInd based on independent-sample t test.

| Climate | WorldClim | CMCC-BioclimInd | <i>p</i> |
|---------|-----------|-----------------|----------|
| bio1    | 5.412     | 14.131          | 0.022    |
| bio2    | 2.477     | 1.819           | 0.649    |
| bio3    | 12.991    | 7.391           | 0.188    |

|       |        |        |       |
|-------|--------|--------|-------|
| bio4  | 20.472 | 23.900 | 0.724 |
| bio5  | 1.406  | 1.223  | 0.762 |
| bio6  | 7.112  | 4.134  | 0.407 |
| bio7  | 2.877  | 3.721  | 0.795 |
| bio8  | 1.021  | 0.553  | 0.458 |
| bio9  | 0.225  | 0.147  | 0.571 |
| bio10 | 0.556  | 4.836  | 0.000 |
| bio11 | 14.020 | 3.116  | 0.094 |
| bio12 | 5.255  | 3.440  | 0.464 |
| bio13 | 2.541  | 1.652  | 0.617 |
| bio14 | 3.721  | 5.371  | 0.294 |
| bio15 | 1.944  | 4.471  | 0.055 |
| bio16 | 4.865  | 8.741  | 0.351 |
| bio17 | 0.401  | 3.025  | 0.000 |
| bio18 | 5.544  | 2.950  | 0.260 |
| bio19 | 7.161  | 5.381  | 0.652 |

Red:  $p < 0.05$ .
